# Supplementary material
Source: PubMed Central journal article supplement (PMC3730918)
Supplement: 7f8b58bffb260d4e329bc734c0e4b4ad_genetics.113.152660-5.pdf [file 7f8b58bffb260d4e329bc734c0e4b4ad_genetics.113.152660-5.pdf]

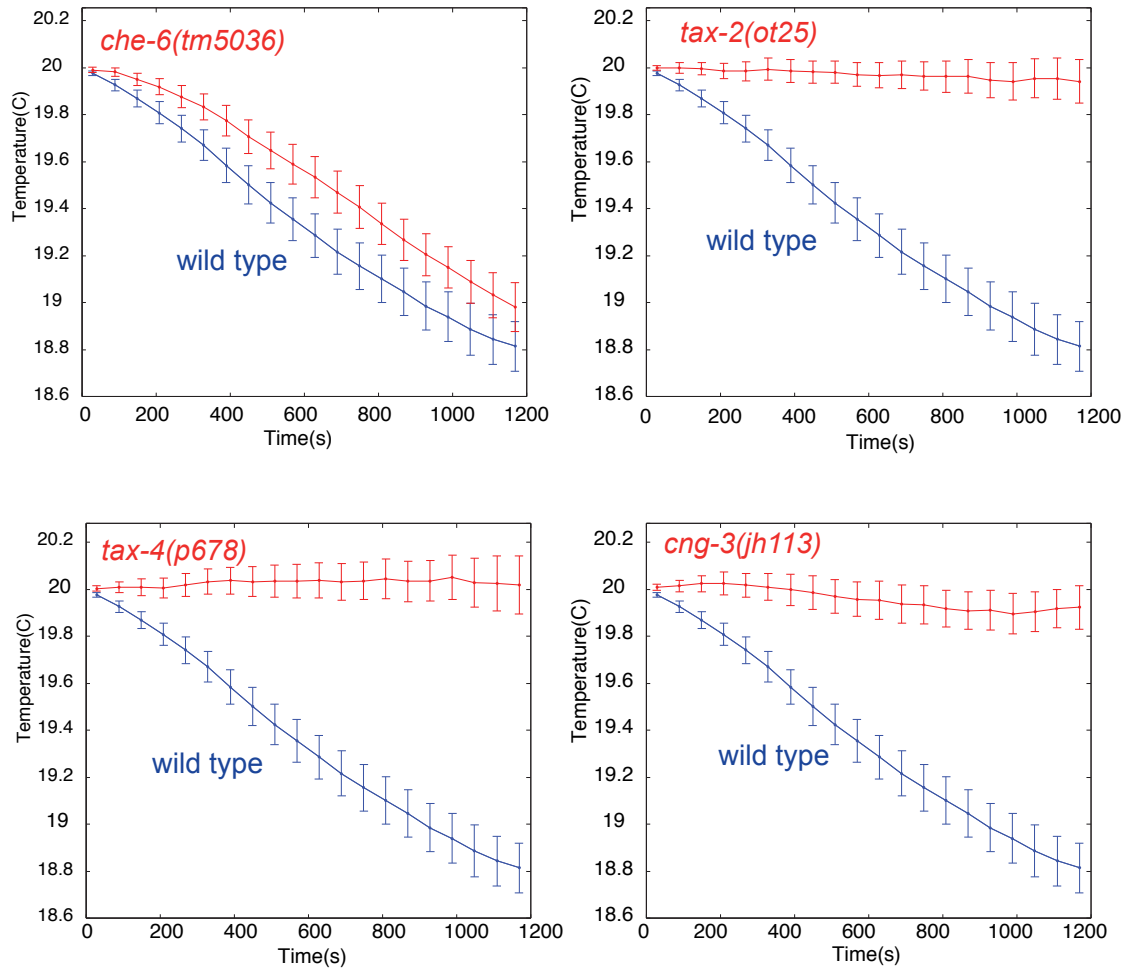

**Figure S3** Alternative representation of thermotaxis data. Average horizontal positions for animals navigating the linear  $0.2^{\circ}\text{C}/\text{cm}$  thermal gradients as described in Figure 9. Worms grown at  $15^{\circ}\text{C}$  were started at  $20^{\circ}\text{C}$ . Solid lines and error bars indicate the mean  $\pm 1$  SEM of horizontal displacement from the start point over time measured over the trajectories of individual worms.
