# Supplementary material
Source: PubMed Central journal article supplement (PMC3730918)
Supplement: 288f142dfa75c7d47f8778cd74501310_genetics.113.152660-2.pdf [file 288f142dfa75c7d47f8778cd74501310_genetics.113.152660-2.pdf]

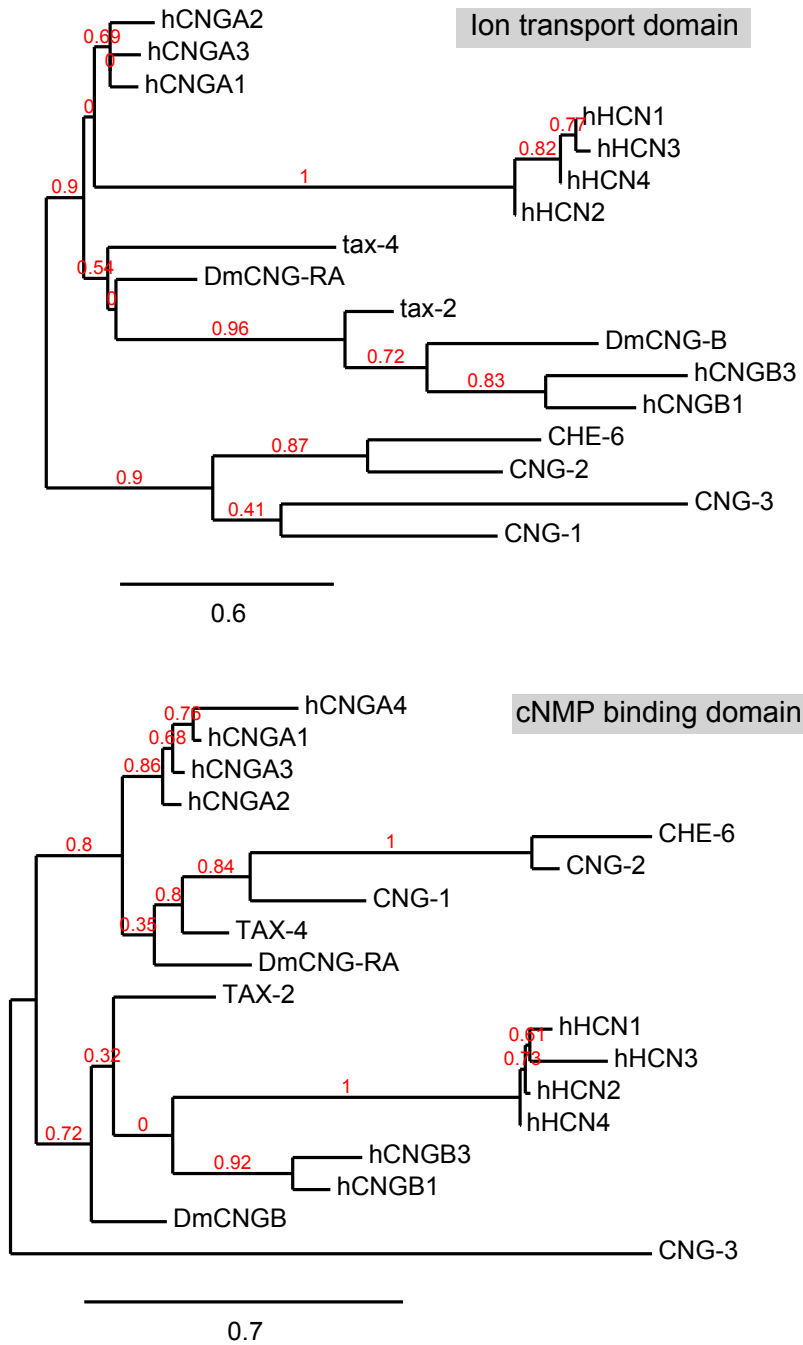

**Figure S2** Phylogeny of CNG channels. (A) Phylogram of cNMP domain. (B) Phylogram of PF00520 Ion transport domain. The domains were defined by SMART database search and the phylogenetic tree was built with default parameters at the [www.phylogeny.fr](http://www.phylogeny.fr) suite (DEREEPER *et al.* 2008).
